# Supplementary material for: Salt or fish (or salted fish)? The Bronze Age specialised sites along the Tyrrhenian coast of Central Italy: New insights from Caprolace settlement
Source: PLoS One. 2019 Nov 13;14(11):e0224435. doi: 10.1371/journal.pone.0224435 (PMC6853298; doi:10.1371/journal.pone.0224435)
Supplement: S5 Appendix — (XLSX) [file pone.0224435.s005.xlsx]

## Sheet: Sheet1
Code	Site	Depth	Sample	14C Age	STD	∂13C	Calibrated Age (OxCal4.3, IntCal13, 95.4%)
GrM 16616	Caprolace, core C19-3	76-78 cm	Wood	595	20	-23.85	1303-1407 cal AD
GrM 16617	Caprolace, core C19-3	94-96 cm	Charcoal	3230	25	-24.45	1606-1433 cal BC
