# Supplementary material for: Salt or fish (or salted fish)? The Bronze Age specialised sites along the Tyrrhenian coast of Central Italy: New insights from Caprolace settlement
Source: PLoS One. 2019 Nov 13;14(11):e0224435. doi: 10.1371/journal.pone.0224435 (PMC6853298; doi:10.1371/journal.pone.0224435)
Supplement: S6 Appendix — (XLSX) [file pone.0224435.s006.xlsx]

## Sheet: CAP 76-78
Caprolace - coring C19-3
Sample CAP 76-78
				Rarefaction curve
Species name/code	Raw count	Percenteges	Species autoecology	# valves	Number of species
Aulacoseira ambigua	8	2.66667	Planktic	20	9
Cyclotella cf. quillensis	125	41.6667	Planktic/ brackish to marine taxa/Cyclotella quillensis has been used as a indicator of dry climatic periods, when precipitation is at a minimum and closed basin lakes become increasingly saline [1]	40	14
Staurosira construens var. venter	67	22.3333	Benthc (but could occur in the plankton)	60	17
Encyonema nicafei	6	2	Benthic	80	20
Ulnaria delicatissima	5	1.66667	Planktic	100	21
Diploneis sp.	12	4	Benthic. The genus Diploneis is typically associated with epipelon and can be found in freshwater, brackish, and marine environments [2]	120	23
Pseudostaurosira brevistriata	2	0.666667	Benthic	140	24
Navicula lanceolata	5	1.66667	Benthic	160	24
Nitzchia	4	1.33333	Benthic	180	25
Encyonema montana	6	2	Benthic	200	25
Navicula cryptocephala	3	1	Benthic	220	26
Nitzschia alpina	14	4.66667	Benthic	240	26
Eunotia sp.	8	2.66667	Benthic/acidic	260	27
Pinnularia microstaurum	1	0.333333	Benthic	280	27
Nitzschia cf. palea	3	1	Benthic
Halamphora latecostata	8	2.66667	Benthic. Some species can occur in estuarine systems
Achnanthes tumescens	6	2	Moist habitats (trees or bogs)
Craticula accomodiformis	1	0.333333	Benthic
Navicula peroti	1	0.333333	Benthic
Rhopalodia	2	0.666667	Benthic/Marshes/nitrogen-poor habitats
Epithemia	1	0.333333	Benthic
Diadesmis	1	0.333333	Benthic
Eunotia canicula	4	1.33333	Benthic/acidic
Bacillaria	3	1	Benthic, epipelic or planktonic habitats, from freshwater to brackish waters [3]. It is able to tolerate fluctuations in salinity
Navicula viridula	3	1	Benthic
Gomphonema olivaceoides	1	0.333333	Benthic
		0
Total	300	100
Total benthic	156	52
Total planktonic	205	68.3333
Total saline	145	48.3333

## Sheet: CAP 94-96
Caprolace - coring C19-3
Sample CAP 94-96
				Rarefaction curve
Species name/code	Raw count	Percenteges	Species autoecology	# valves	Number of species
Eunotia incisa	6	1.99336	Benthic/acidic	20	9
Reimeria sinuata	2	0.664452	Benthic	40	13
Gomphonema sarcophagus	6	1.99336	Benthic/Periphytic/Eutrophic	60	16
Navicula lanceolata	7	2.32558	Benthic/Fresh and brackish water	80	18
Staurosira construens var. venter	70	23.2558	Benthic (but could occur in the plankton)	100	19
Cyclotella cf. quillensis	69	22.9236	Planktic/ brackish to marine taxa/Cyclotella quillensis has been used as a indicator of dry climatic periods, when precipitation is at a minimum and closed basin lakes become increasingly saline [1]	120	23
Ulnaria delicatissima	5	1.66113	Planktic	140	23
Nitzschia cf. palea	9	2.99003	Benthic	160	23
Lemnicola sp	6	1.99336	Benthic	180	24
Rhopalodia sp	24	7.97342	Benthic/Marshes/nitrogen-poor habitats	200	27
Navicula cf. angusta	6	1.99336	Benthic	220	29
Encyonema sp.	4	1.3289	Benthic	240	29
Diploneis cf. eliptica	17	5.64784	Benthic. The genus Diploneis is typically associated with epipelon and can be found in freshwater, brackish, and marine environments [2]	260	30
Achnanthidium sp	1	0.332226	Benthic	280	30
Pseudostaurosira cf. eliptica	6	1.99336	Benthic	300	30
Diploneis sp.	1	0.332226	Benthic. The genus Diploneis is typically associated with epipelon and can be found in freshwater, brackish, and marine environments [2]
Amphora copulata	8	2.65781	Benthic
Nitzschia kurzeana	5	1.66113	Benthic
Achnanthes tumescens	11	3.65449	Moist habitats (trees or bogs)
Gomphonema olivaceoides	5	1.66113	Benthic
Navicula peroti	8	2.65781	Benthic
Craticula accomodiformis	3	0.996678	Benthic
Pinnularia divergissima	3	0.996678	Benthic
Craticula	1	0.332226	Benthic
Amphora sp.	5	1.66113	Benthic. Some species can occur in Estuarine systems
Bacillaria	1	0.332226	Benthic, epipelic or planktonic habitats, from freshwater to brackish waters [3]. It is able to tolerate fluctuations in salinity
Amphora ovalis	2	0.664452	Benthic
Synedra famelica	1	0.332226	Benthic
Encyona sp.	6	1.99336	Benthic
Encyonema minutum var. pseudogracilis	3	0.996678	Benthic
		0
Total	301	100
Total benthic	216	71.7608
Total planktonic	144	47.8405
Total saline	93	30.897

## Sheet:  Summary and comments
CAP 76-78	Abundance (%)					CAP 94-96	Abundance (%)
Total benthic	52					Total benthic	71.7608
Total planktonic	68.3333					Total planktonic	47.8405
Total saline/brackish	48.3333					Total saline/brackish	30.897
Comments
It seems that both samples are composed of species that are favored by brackish/saline water. Although this ecological group is the smaller of the three (saline, planktonic, benthic), the most abundant species (the one that found an environment favorable enough to reproduce and reach co-dominace) was Cyclotella quillensis, a brackish to marine taxa.
I haven't foud any exclusive marine species and I have found a number of species associate with freswater, so I do not support the idea that those samples come from exclusive marine systems. At the same time, if they were exclusive freshwater systems, I would not have found such a large abundance of brackish taxa
Finally, it seems that sample CAP 76-78 was from an environment with higher water level compared to CAP 94-96 (due to the dominance of planktonic taxa versus the dominance of benthic taxa in CAP 04-96). I am not sure if this is a result of a difference between environments or if it is related to one being from a drier time than the other.

## Sheet: References
1. Fritz SC, Juggins S, Battarbee, RW, Engstrom, DR. Reconstruction of past changes in salinity and climate using a diatom-based transfer function. Nature. 1991; 352: 706-708
2. Cleve PT. Synopsis of the Naviculoid Diatoms, Part I. Kongliga Svenska-Vetenskaps Akademiens Handlingar. 1894; 26(2): 1-194, 5 pls
3. Jahn R, Schmid A. Revision of the brackish-freshwater diatom genus Bacillaria Gmelin (Bacillariophyta) with the description of a new variety and two new species. European Journal of Phycology. 2007; 42(3): 295-312
