# Supplementary material for: Salt or fish (or salted fish)? The Bronze Age specialised sites along the Tyrrhenian coast of Central Italy: New insights from Caprolace settlement
Source: PLoS One. 2019 Nov 13;14(11):e0224435. doi: 10.1371/journal.pone.0224435 (PMC6853298; doi:10.1371/journal.pone.0224435)
Supplement: S10 Appendix — (XLSX) [file pone.0224435.s010.xlsx]

## Sheet: Corings
Caprolace coring descriptions
Coring no	subnr	Layer nr	Top	Bottom	Description
C1		1	0	35	Humic peaty sand
C1		2	35	45	Humic sand, pottery at the bottom
C1		3	45	90	Clayey sand, reduced. Cobble at 70 cm, water level at 80 cm, ceramics until 80-90 cm
C1		4	90	130	Peaty clayey sand, dark, plant remains (smelly)
C1		5	130	155	Grey humic sand with plant remains
C2		1	0	60	Humic sand
C2		2	60	75	Yellow Humic sand
C2		3	75	110	Yellow sand with grey clay, Gley mottles, more dense, compact then above
C2		4	110	140	Reduced green-gray sand, slightly clayey
C3		1	0	50	Humic sand, dark, few ceramics
C3		2	50	70	Yellow sand
C3		3	70	80	Yellow sand with orange mottling (gley)
C3		4	80	130	Yellow-grey sand, more clayey and more compact than layer above
C3		6	130	132	Grey reduced sand, ceramics
C3		7	135	160	Grey reduced sand, ceramics
C4		1	0	70	Dark humic sand
C4		2	70	100	Yellow sand, loose
C4		3	100	130	Yellow sand, more dense than above
C4		4	130	160	Grey-yellow sand, slightly loamy, wet, weak
C5		1	0	60	Humic sand
C5		2	60	140	Yellow sand, transition to grey sand
C5		3	140	160	Wet yellow grey sand
C6		1	0	40	Humic sand
C6		2	40	110	Sand, clay poor, at 40cm large piece of tuff
C6		3	110	120	Sand, slightly clayey
C6		4	120	140	Sand, clayey, gleyic, unripened
C6		5	140	150	Reduced wet sand, slightly clayey
C7		1	0	50	Humic sand
C7		2	50	90	Yellow sand
C7		3	90	110	Yellow gleyic sand
C7		4	110	150	Grey sand, reduced, slightly clayey, unripened, wet
C8		1	0	45	Humic, slightly peaty sand
C8		2	45	55	Yellow sand
C8		3	55	70	Clayey-grey-yellow sand
C8		4	70	100	Grey yellow sand, clay poor
C9		1	0	40	Humic sand
C9		2	40	70	Clayey sand, dark, ceramics
C9		3	70	90	Grey clayey sand
C10					No description, at water surface (near southern Archaeological pit)
C11		1	0	40	Dark humic sand
C11		2	40	80	Grey yellow sand
C11		3	80	100	Loamy sand
C11		4	100	120	Sand, gradual transition to grey-greenish sand
C12		1	0	50	Humic sand
C12		2	>50		Yellow sand, more compact and grey
C13		1	0	90	Humic sand
C13		2	90	120	Yellow grey sand, slightly clayey, more gleyish and wetter
C14		1	0	70	Dark hunic sand
C14		2	70	100	More yellow sand
C14		3	100	120	Yellow,Grey-greenish sand, wetter
C14		4	120	150	Loamey, clayey sand
C15		1	0	30	Humic sand, ceramic (black gloss) at 30 cm
C15		2	30	50	Black humic sand
C15		3	50	65	Yellow sand
C15		4	65	100	Grey-yellowish sand, gleyic, clayey layer at 75 cm
C15		5	100	120	Grey-greenish-yellowish sand, slightly clayey, in water(groundwater)
C16		1	0	30	Humic sand
C16		2	30	50	Grey clayey, protohistoric layer?
C16		3	50	100	Gradual transition to reduced sand
C17		1	0	20	Humic sand
C17		2	20	30	Sand with potsherd
C17		3	30	50	Grey sandy clay with ceramics
C17		4	50	60	Transition to sandy layer
C17		5	60	70	Grey yellow sand, weak clayey
C18		1	0	30	Humic sand
C18		2	30	45	Peat, oxidized
C18		3	45	70	Grey clay with potsherd,ceramics, charcoal at 55 cm
C18		4	70	150	Grey clayey sand
C19	C19-1	1	0	80	-
C19	C19-1	2	80	100	Clay with piece of roman glass
C19	C19-1	3	100	130	Peat
C19	C19-1	4	130	150	Gradual transition towards sand
C19	C19-W				C19- in water (no depths recorded)
C19	C19-W				sandy clay
C19	C19-W				sand
C19	C19-W				peat
C19	C19-WW	1	0	40	Water
C19	C19-WW	2	40	50	disturbed mud
C19	C19-WW	3	50	55	Clay with sand lens, clay and sand sampled
C19	C19-WW	4	55	60	Peat with sand, sampled
C19	C19-WW	5	60	65	Peat with sand lens, sampled
C19	C19-WW	6	65	140	Peat, sampled
C19	C19-3				C19-3: core for Palaeoenv
C19	C19-3				68 to 117 cm depth sampled
C19	C19-3
C19	C19-3	1	0	68	Not sampled
C19	C19-3	2	68	92	Grey sandy clay
C19	C19-3	3	92	93	Sand traces
C19	C19-3	4	93	117	Peat
C19	C19-4				C19-4: core for Palaeoenv
C19	C19-4				68 to 117 cm depth sampled
C19	C19-4
C19	C19-4	1	0	68	Not sampled
C19	C19-4	2	68	88	Clay
C19	C19-4	3	88	89	Sand traces
C19	C19-4	4	89	117	Peat
C19	C19-5				C19 – 5: core for Palaeoenv
C19	C19-5				67 – 116 cm depth sampled. Suitable for dateable materials
C19	C19-5
C19	C19-5	1	0	60	Dark sandy peaty topsoil
C19	C19-5	2	60	70	Yellow sand
C19	C19-5	3	70	88	Grey sandy clay, charcoal at 80.
C19	C19-5	4	88	89	sand (lenses)
C19	C19-5	5	89	92	Laminated clay to peat
C19	C19-5	6	92	120	Peat with macro remains
C19	C19-5	7	120		End of core
C19	C19-6				Good general profile description for C19, Groundwater at 37cm, surface at +37
C19	C19-6				General description
C19	C19-6	1	0	30	humic sandy topsoil
C19	C19-6	2	30	40	Yellowish sand with Gley mottles
C19	C19-6	3	40	50	Clayey peat
C19	C19-6	4	50	65	Peaty clay
C19	C19-6	5	65	85	Blue-grey clay with plant remains
C19	C19-6	6	85	88	Blue-grey peaty clay with plant remains, fine layered
C19	C19-6	7	88	89	AV-ash lense in peaty clay
C19	C19-6	8	89	92	Fine layered clay, transition into peat below
C19	C19-6	9	92	130	Peat with macro remains
C19	C19-6		130		End of core
C19	C19-7				Thin section sample: 85-92 cm depth
C19	C19-7	1	85	88	Layered clay with peat
C19	C19-7	2	88	89	sand with mica?
C19	C19-7	3	89	92	Layered clay with peat
C20		1	0	40	Humic sand, potsherd (very red)
C20		2	40	70	Clayey sand
C20		3	70	80	Clayey sand with ceramics (briquetage)
C20		4	80	100	Yellowish sand
C20		5	100	125	Clayey sand
C20		6	125	150	Peaty sand (same layer as AV-peat?)
C20		7	150	170	Humic sand
C21					Caprolace small island, taken in water
C21		1	0	20	Water
C21		2	20	40	Sand
C21		3	40	100	Peat
C22					In water
C22		1	0	20	Water
C22		2	20	40	Sand
C22		3	40	100	Peat
C23					On top of Caprolace small island
C23		1	0	50	Humic dark sand, potsherd at 50 cm
C23		2	50	90	Humic dark sand, potsherd at 90 cm
C23		3	90	110	Sand, gleyic, reduced
					10 m N of C23:
		1	0	210	Sand, Humic top part, gleyic at 2m
Onshore marsh
					Visit onshore marsh area W of Caprolace, appr in between 2 islands
					5 corings, showing similar profile as northwest Caprolace big island. General profile:
		1	0	50	Peat, sand layer at 50 cm (aeolian quartz)
		2	50	69	Clay
		3	69	70	Clay with trace of Mica's, sand, tephra??
		4	70	150	Peat

## Sheet: GPS data
GPS locations (LL WGS84)
Name	X	Y
C1	12.9625	41.3562
C2	12.9626	41.3562
C3	12.9627	41.3562
C4	12.9628	41.3561
C5	12.9628	41.356
C6	12.9629	41.356
C7	12.9629	41.3559
C8	12.9629	41.3559
C9	12.9629	41.3559
C10	12.9629	41.3559
C11	12.9628	41.3559
C12	12.9629	41.356
C13	12.963	41.356
C15	12.9626	41.3561
C14	12.9627	41.3561
C18	12.9626	41.3561
C17	12.9626	41.3561
C19	12.9625	41.3562
C20	12.9625	41.3562
C19W	12.9625	41.3563
C19WW	12.9624	41.3562
C21	12.9635	41.3555
C22	12.9637	41.3556
C23	12.9636	41.3555
