# Supplementary material for: Salt or fish (or salted fish)? The Bronze Age specialised sites along the Tyrrhenian coast of Central Italy: New insights from Caprolace settlement
Source: PLoS One. 2019 Nov 13;14(11):e0224435. doi: 10.1371/journal.pone.0224435 (PMC6853298; doi:10.1371/journal.pone.0224435)
Supplement: S11 Appendix — (XLSX) [file pone.0224435.s011.xlsx]

## Sheet: Sheet1
Caprolace archaeometry
Find n.	SU	Fig.	Washed with fresh water	EMPA	SEM-EDS	Characterization of pottery
125	202	Wall with lug	No		X	Mineral composition and phases determination
129	202	7	No		X	Mineral composition and phases determination
131	202	6	No		X	Mineral composition and phases determination
133	202	6	No	X	X	Mineral composition and phases determination
134	202	7	No	X	X	Mineral composition and phases determination
185	202	5	No		X	Mineral composition and phases determination
229	103	17	Yes		X	Mineral composition and phases determination
235	104	15	Yes		X	Mineral composition and phases determination
233	104	15	Yes		X	Mineral composition and phases determination
253	212	8	Yes		X	Mineral composition and phases determination
EMPA: Electron Microprobe Analysis
SEM-EDS: Scanning Electron Microscopes - Energy Dispersive X-ray Spectrometry
All thin-sections have been dry-cut to avoid the removal of soluble constituents
